# Supplementary material for: Combination Effect of Cilengitide with Erlotinib on TGF-β1-Induced Epithelial-to-Mesenchymal Transition in Human Non-Small Cell Lung Cancer Cells
Source: MDPI journal article supplement (doi:10.3390/ijms23073423), 2022-03-22
Supplement: s1 [file s1]

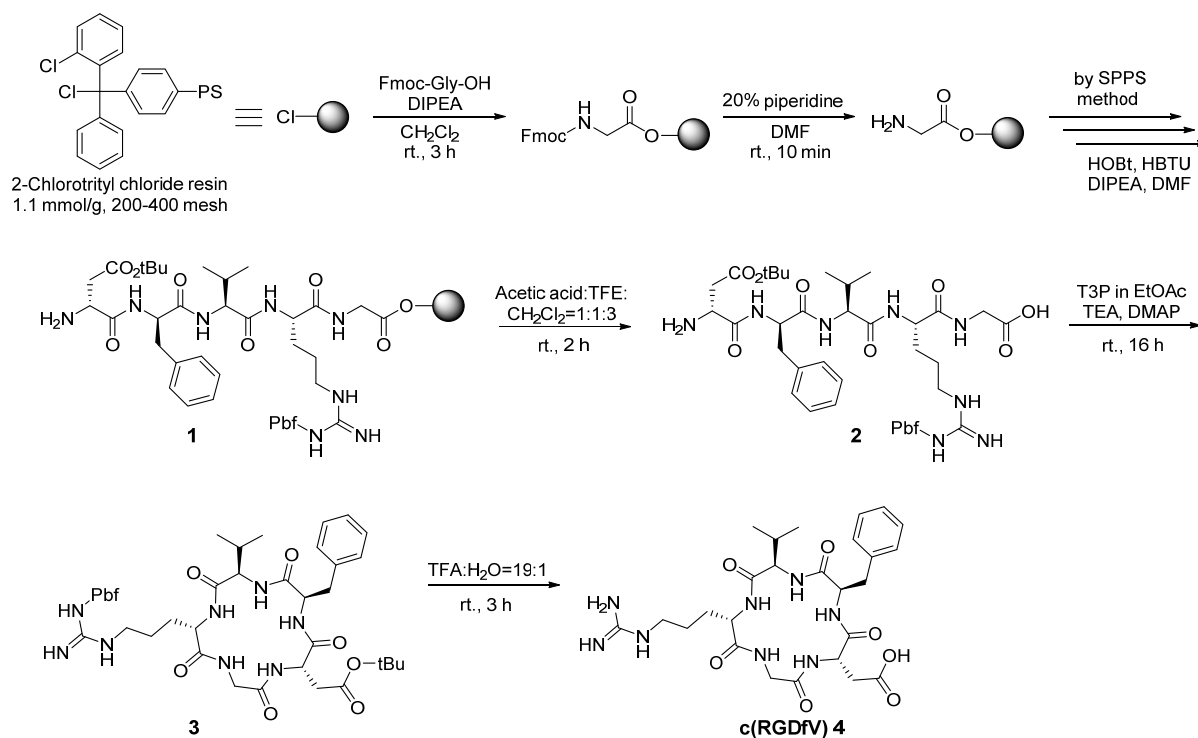

**Figure S1.** Synthetic scheme for cilengitide, c(RGDfV) **4**. Protected linear pentapeptide **1** bound to the resin was synthesised using the Fmoc solid-phase peptide synthesis (SPPS) method. Linear peptide **2** was cleaved from the resin by acetic acid/TFE/CH<sub>2</sub>Cl<sub>2</sub> (1:1:3 ratio) solution without affecting other protecting groups. Finally, cyclic pentapeptide c(RGDfV) **4** was obtained by head-to-tail cyclisation under T3P, TEA, and DMAP, and elimination of the protecting group by TFA:H<sub>2</sub>O=19:1(v/v).

## **Experimental Section**

### **Mass spectrometry**

Cilengitide masses were determined on a Waters ACQUITY UPLC H-Class/SQD2.

### **HPLC spectrometry**

HPLC analysis of cilengitide was conducted in H<sub>2</sub>O solution (1 mg/mL) using a Shimadzu HPLC 2030 model with a Vydac 218TP C18 column (5  $\mu$ m, 4.6  $\times$  250 mm). The A buffer was 0.1% trifluoroacetic acid (TFA) in H<sub>2</sub>O, and the B buffer was 0.1% TFA in CH<sub>3</sub>CN. The flow rate was 1 mL/min with a gradient of 0%–3% B in 3 min, 3%–60% B in 33 min, and 60% B in 35 min.

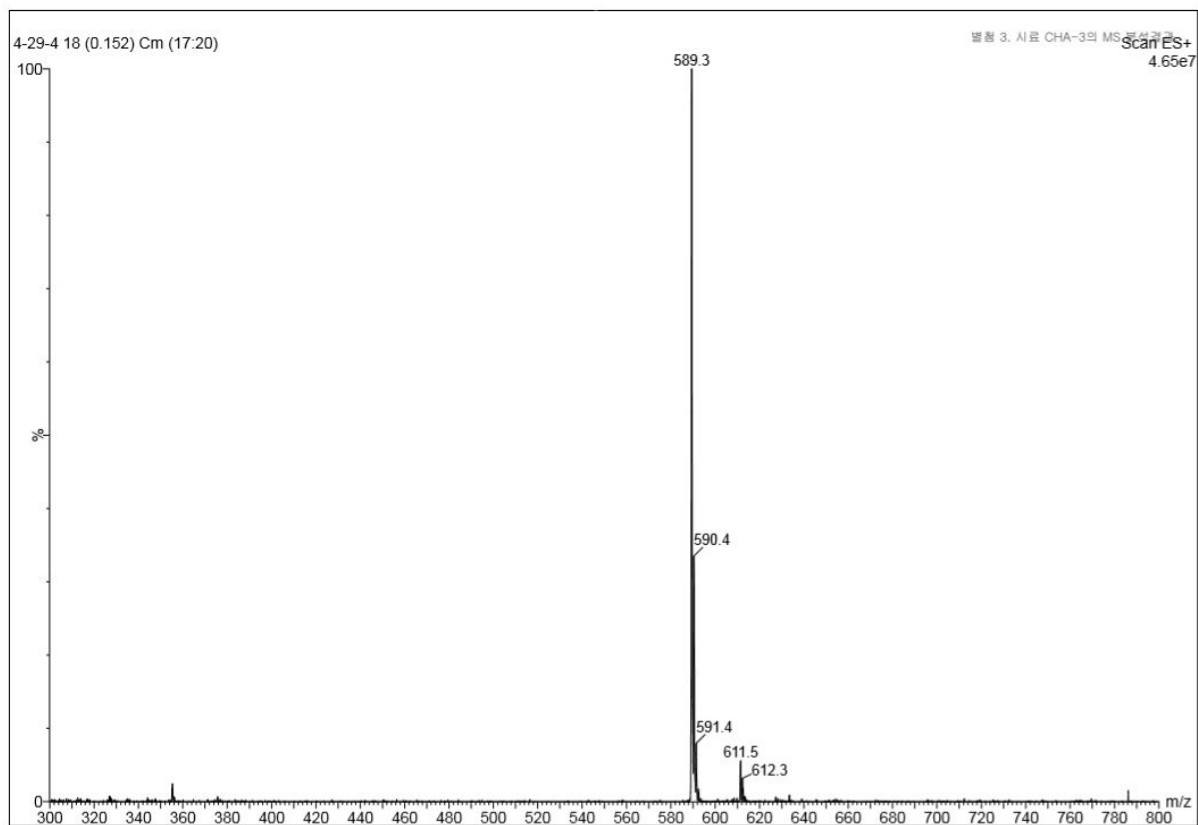

**Figure S2.** LC-mass spectrum of cilengtide. Molecular weight calculated, 588.6; observed, 589.3.

**<Chromatogram>**

mV

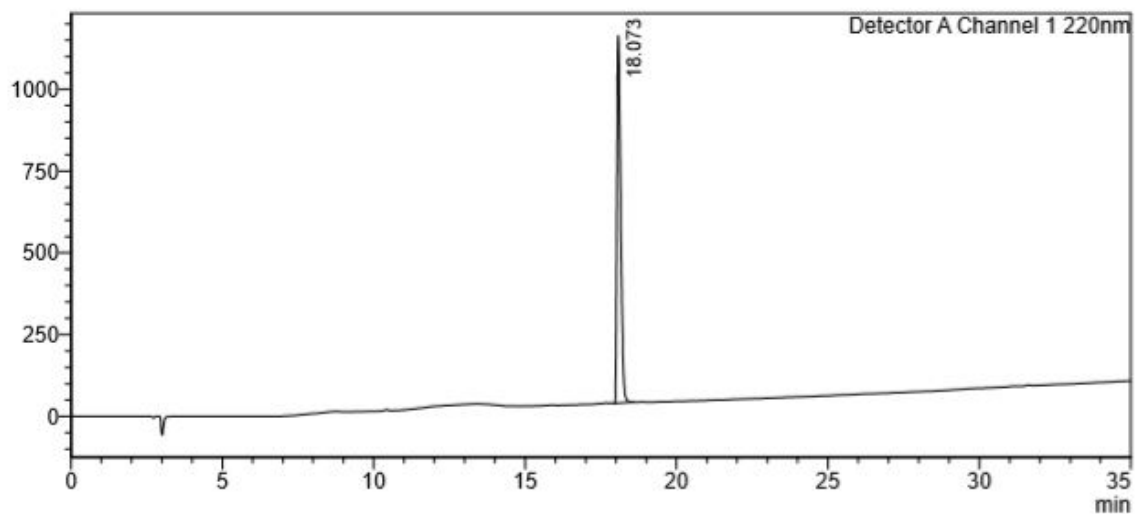

**<Peak Table>**

Detector A Channel 1 220nm

| Peak# | Ret. Time | Area    | Area%   | Height  | Height% |
|-------|-----------|---------|---------|---------|---------|
| 1     | 18.073    | 9840631 | 100.000 | 1123116 | 100.000 |
| Total |           | 9840631 | 100.000 | 1123116 | 100.000 |

**Figure S3.** HPLC spectrum of cilengitide.

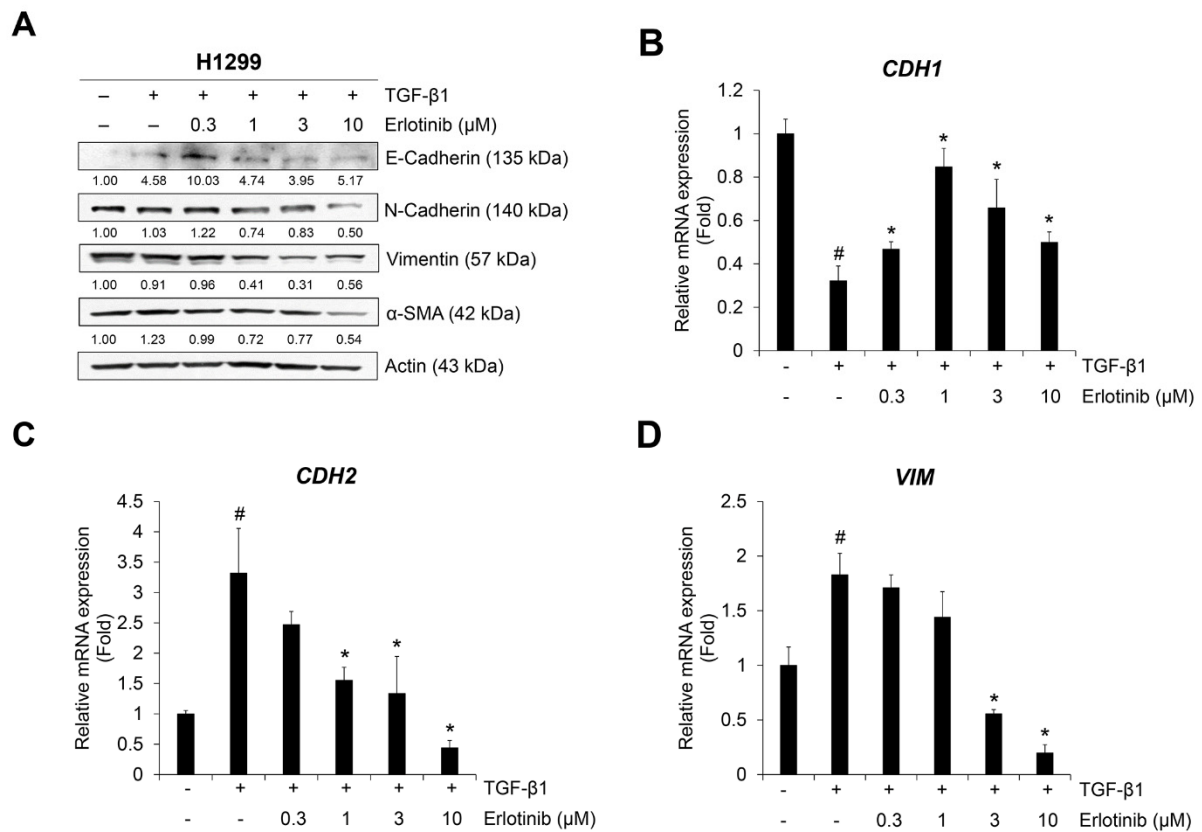

**Figure S4.** Erlotinib inhibits TGF- $\beta$ 1-induced expression of EMT markers in H1299 cells. **(A)** Serum-deprived H1299 cells were treated with TGF- $\beta$ 1 (5 ng/mL) or in combination with erlotinib for 72 h. Protein expression of an epithelial marker (E-cadherin) and mesenchymal markers (N-cadherin, vimentin, and  $\alpha$ -smooth muscle actin) was determined by western blot analysis. Actin was used as a loading control. **(B-D)** Serum-deprived A549 cells were incubated with TGF- $\beta$ 1 (5 ng/mL) and erlotinib for 48 h. After RNA extraction and cDNA synthesis, we performed qRT-PCR to measure the expression of CDH1, CDH2, and VIM mRNA using GAPDH as an internal control. #  $p < 0.01$  versus control; \*  $p < 0.05$  versus the group treated with TGF- $\beta$ 1 only.

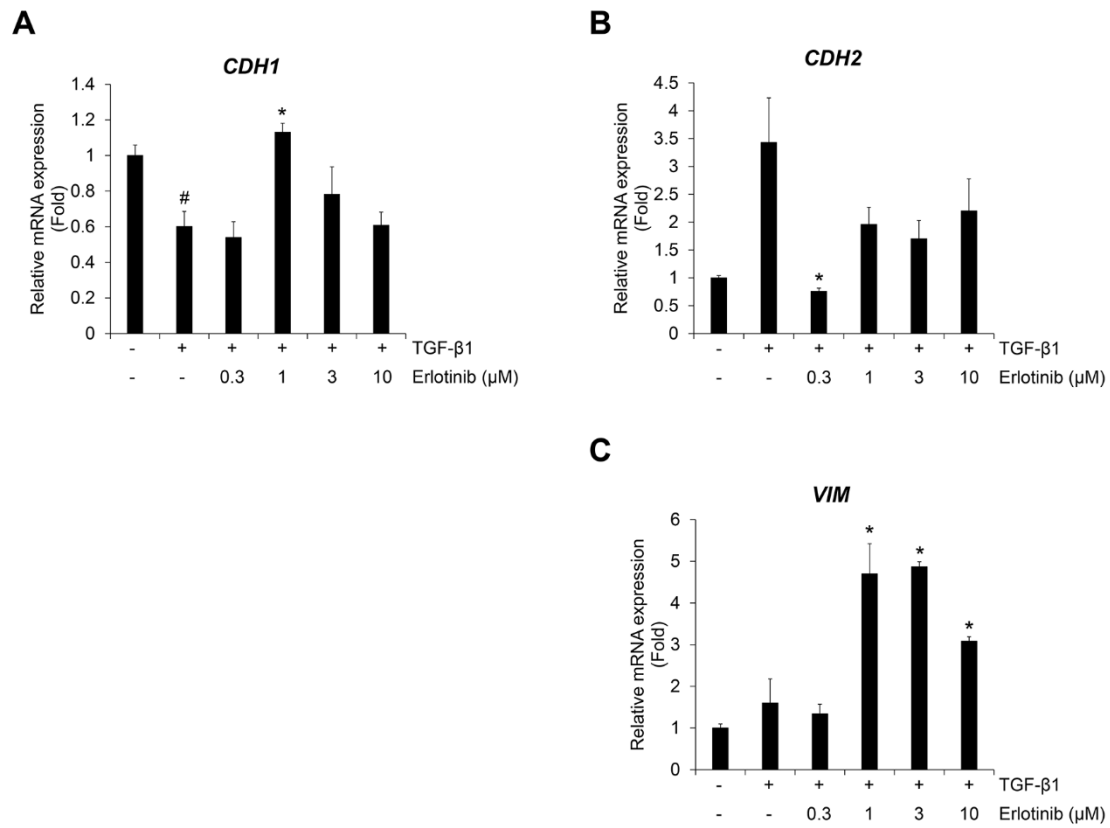

**Figure S5.** Effect of erlotinib on TGF-β1–induced expression of EMT marker genes in CPAE cells. (A–C) Serum-deprived A549 cells were incubated with TGF-β1 (5 ng/mL) and erlotinib for 48 h. After RNA extraction and cDNA synthesis, we performed qRT-PCR to measure the expression of CDH1, CDH2, and VIM mRNA using GAPDH as an internal control. <sup>#</sup>  $p < 0.01$  versus control; <sup>\*</sup>  $p < 0.05$  versus the group treated with TGF-β1 only.

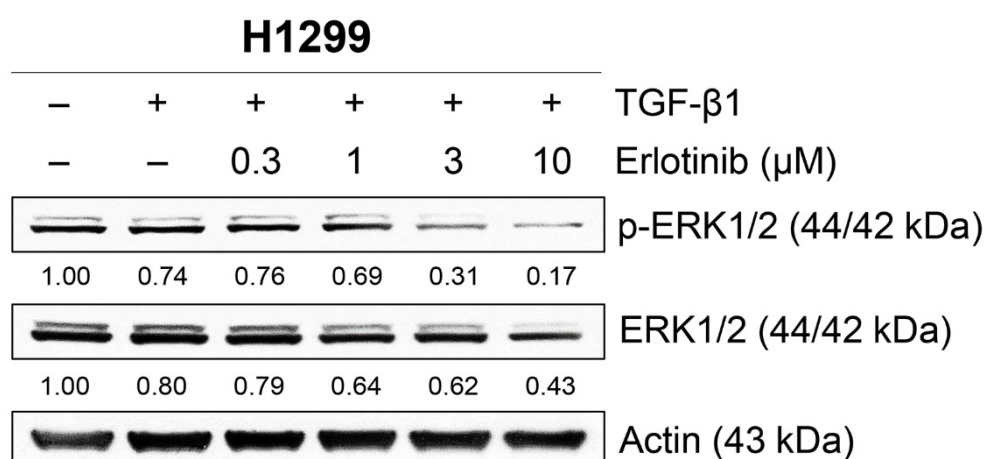

**Figure S6.** Erlotinib inhibits TGF- $\beta$ 1–induced non-Smad signalling in H1299 cells. Serum-deprived H1299 cells were treated with TGF- $\beta$ 1 (5 ng/mL) or in combination with erlotinib for 48 h. Phosphorylation of ERK1/2 was determined by western blot analysis. Actin was used as a loading control.

**A**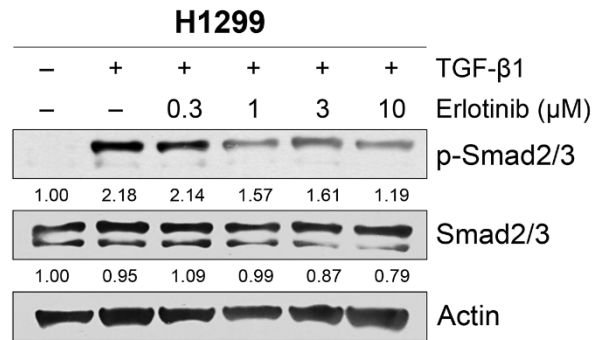**B**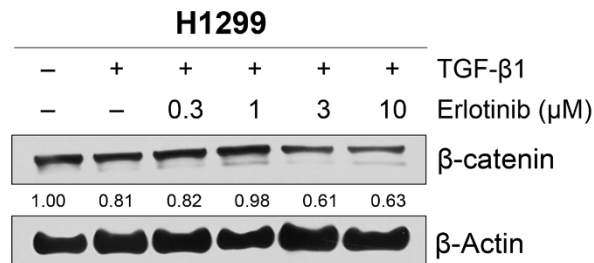

**Figure S7.** Erlotinib inhibits TGF- $\beta$ 1–induced Smad and non-Smad signalling in H1299 cells. Serum-deprived H1299 cells were treated with TGF- $\beta$ 1 (5 ng/mL) or in combination with erlotinib for 48 h. Phosphorylation of Smad2/3 (A) and expression of cytosolic  $\beta$ -catenin was determined by western blot analysis. Actin and  $\beta$ -actin were used as loading controls.



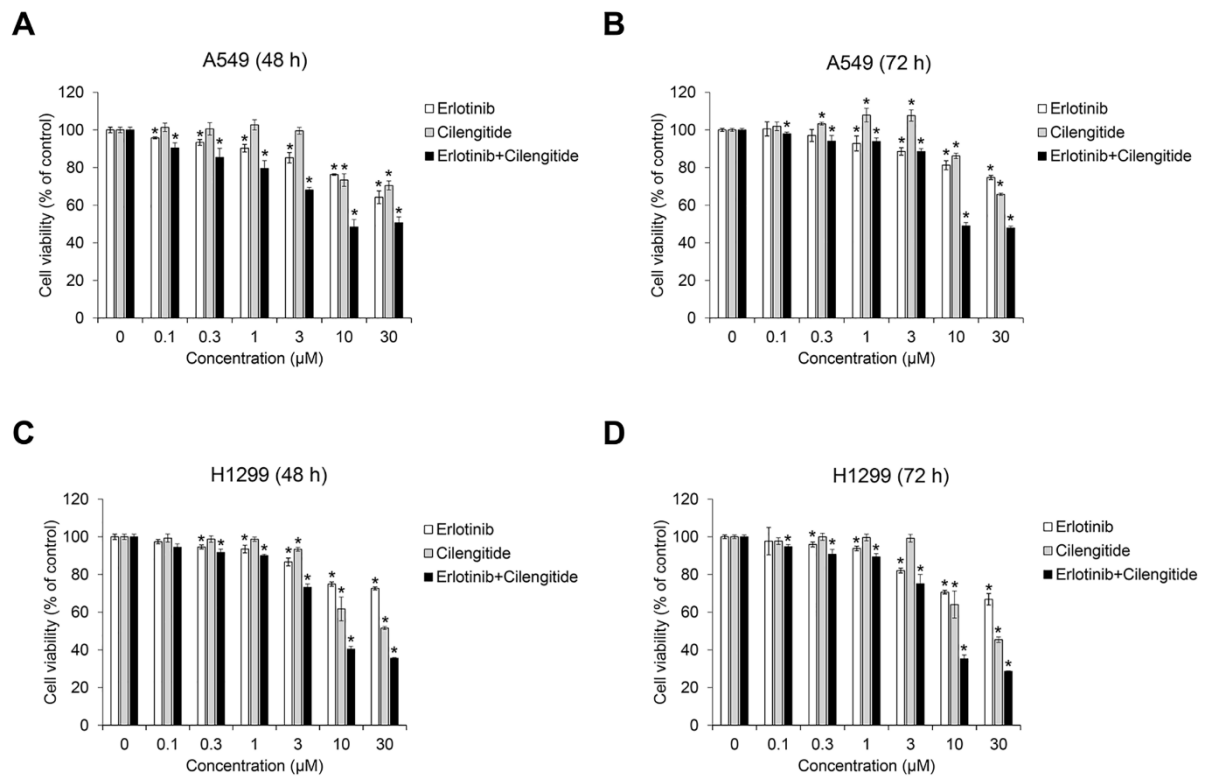

**Figure S8.** Cilengitide enhances the inhibitory effect of erlotinib on the viability of A549 and H1299 cells. (A and B) A549 and (C and D) H1299 cells were treated with erlotinib alone or in combination with cilengitide for 48 or 72 h. After incubation, cell viability was measured using the CCK-8 assay. Experiments were performed in triplicate. Data represent mean  $\pm$  SD. \*  $p < 0.05$  versus untreated control.

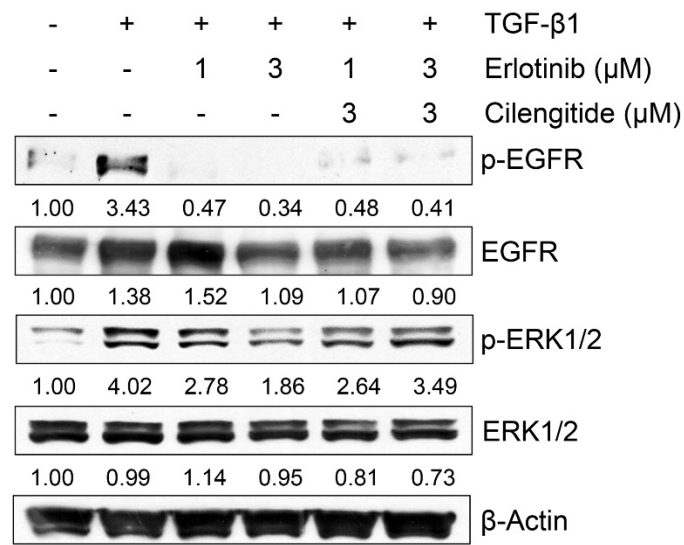

**Figure S9.** Effect of combined treatment on TGF- $\beta$ 1–induced non-Smad signalling. A549 cells were treated with gefitinib (1  $\mu$ M) and cilengitide (3  $\mu$ M) individually or in combination, and then incubated with TGF- $\beta$ 1 (5 ng/mL) for 72 h. Protein expression was measured by western blot analysis. Actin was used as a loading control.

**A**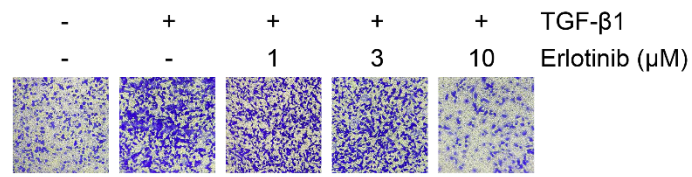**B**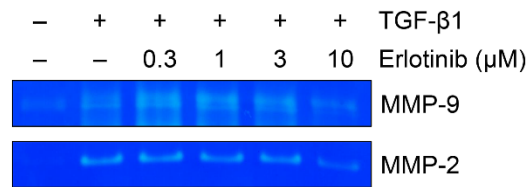

**Figure S10.** The effect of erlotinib on TGF- $\beta$ 1-induced invasion and MMP activity in A549 cells. Serum-deprived A549 cells were treated with TGF- $\beta$ 1 (5 ng/mL) and erlotinib for 48 h. (A) The effect of erlotinib on TGF- $\beta$ 1-induced invasion of A549 cells was evaluated using Boyden chambers. (B) Activation of MMP-2 and MMP-9 was measured by gelatin zymography.

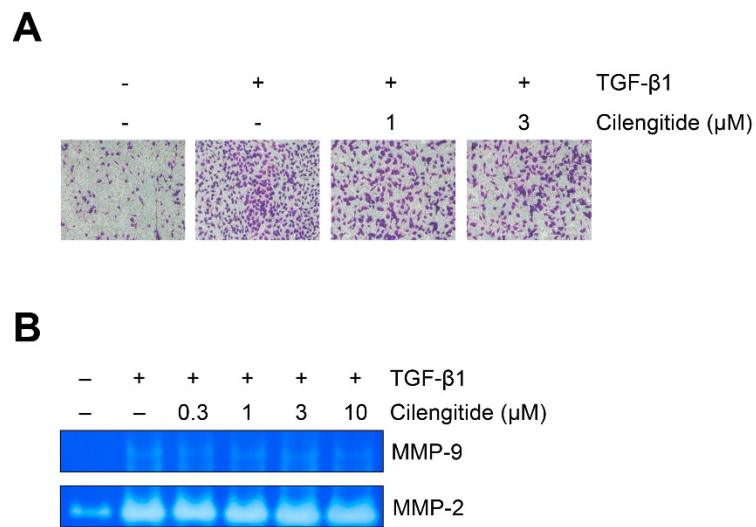

**Figure S11.** The effect of cilengitide on TGF- $\beta$ 1–induced invasion and MMP activity in A549 cells. Serum-deprived A549 cells were treated with TGF- $\beta$ 1 (5 ng/mL) and cilengitide for 48 h. **(A)** The effect of cilengitide on TGF- $\beta$ 1–induced invasion of A549 cells was evaluated using Boyden chambers. **(B)** Activation of MMP-2 and MMP-9 was measured by gelatine zymography.

**Table S1.** Sequences of primers used in this study.

| Target gene  | Forward (5' – 3')    | Reverse (5' – 3')    |
|--------------|----------------------|----------------------|
| <i>CDH1</i>  | TCCGAAGCTGCTAGTCTGAG | CTCAAGGGAAGGGAGCTGAA |
| <i>CDH2</i>  | CCCACAGCTCCACCATATGA | TTCAGTCATCACCTCCACCA |
| <i>VIM</i>   | CGCCAACTACATCGACAAGG | GGCTTTGTCGTTGGTTAGCT |
| <i>GAPDH</i> | GAGTCAACGGATTTGGTCGT | GATCTCGCTCCTGGAAGATG |

**Table S2.** Combination index (CI) values for the two-drug combination against A549 cell viability.

| Cell line | Incubation time (h) | Erlotinib ( $\mu\text{M}$ ) | Cilengitide ( $\mu\text{M}$ ) | CI value |
|-----------|---------------------|-----------------------------|-------------------------------|----------|
| A549      | 48 h                | 0.1                         | 0.1                           | 0.2425   |
|           |                     | 0.3                         | 0.3                           | 0.3032   |
|           |                     | 1                           | 1                             | 0.3484   |
|           |                     | 3                           | 3                             | 0.1171   |
|           |                     | 10                          | 10                            | 0.0049   |
|           |                     | 30                          | 30                            | 0.0256   |
|           | 72 h                | 0.1                         | 0.1                           | 0.4949   |
|           |                     | 0.3                         | 0.3                           | 0.6539   |
|           |                     | 1                           | 1                             | 2.0795   |
|           |                     | 3                           | 3                             | 2.0498   |
|           |                     | 10                          | 10                            | 0.0015   |
|           |                     | 30                          | 30                            | 0.0034   |
| H1299     | 48 h                | 0.1                         | 0.1                           | 0.4995   |
|           |                     | 0.3                         | 0.3                           | 0.9604   |
|           |                     | 1                           | 1                             | 2.4855   |
|           |                     | 3                           | 3                             | 0.7146   |
|           |                     | 10                          | 10                            | 0.0247   |
|           |                     | 30                          | 30                            | 0.0314   |
|           | 72 h                | 0.1                         | 0.1                           | 0.4168   |
|           |                     | 0.3                         | 0.3                           | 0.5463   |
|           |                     | 1                           | 1                             | 1.4124   |
|           |                     | 3                           | 3                             | 0.3775   |
|           |                     | 10                          | 10                            | 0.0004   |
|           |                     | 30                          | 30                            | 0.0002   |
